# Supplementary material
Source: PubMed Central journal article supplement (PMC4678782)

The American Journal of Human Genetics

Supplemental Data

## **Somatic Activating *PIK3CA* Mutations Cause Venous Malformation**

**Nisha Limaye, Jaakko Kangas, Antonella Mendola, Catherine Godfraind, Matthieu J. Schlögel, Raphael Helaers, Lauri Eklund, Laurence M. Boon, and Miikka Vikkula**

## Supplemental Data

**Figure S1. D-dimer levels in unifocal VM.** D-dimer levels vary significantly between subjects with mutations detected in *TEK*, *PIK3CA* or neither (*N.D.*: None detected). Tukey box and whiskers plot. Dots: Outliers. Pattern of distribution differs significantly between the three groups,  $p = 0.0127$ , Kruskal-Wallis test. \*:  $p < 0.05$  vs. *TEK*; #:  $p < 0.05$  vs. *PIK3CA*, post-hoc Dunn's multiple comparison test.

FIGURE S1

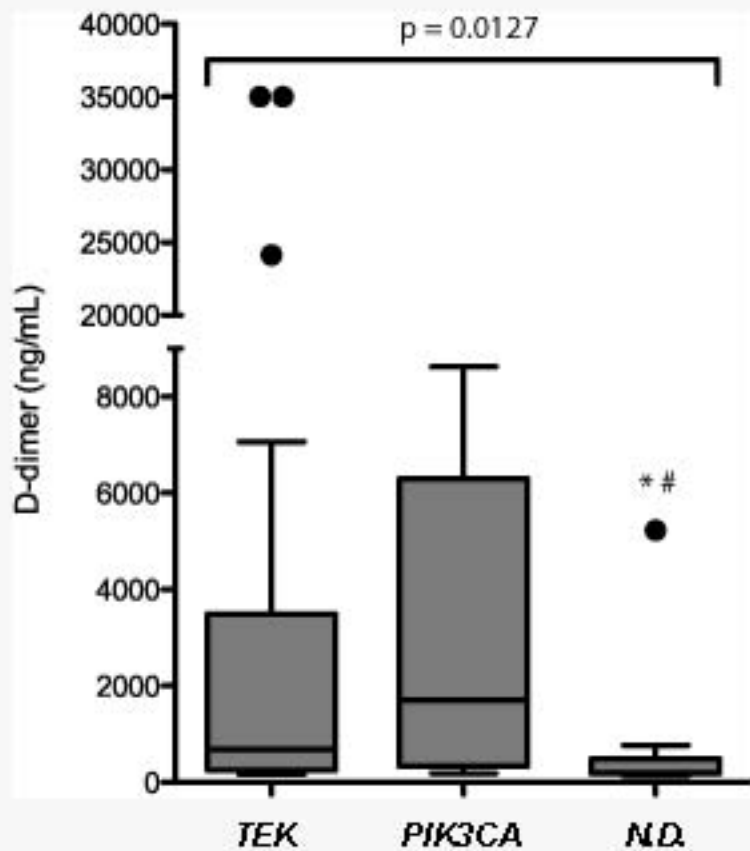

Supplement: mmc1.pdf [file mmc1.pdf]
